# Supplementary material for: The Effect of Triptolide-Loaded Exosomes on the Proliferation and Apoptosis of Human Ovarian Cancer SKOV3 Cells
Source: PubMed Central journal article supplement (PMC6556367; doi:10.1155/2019/2595801), 2019-05-21
Supplement: 2595801.f1.pdf [file 2595801.f1.pdf]

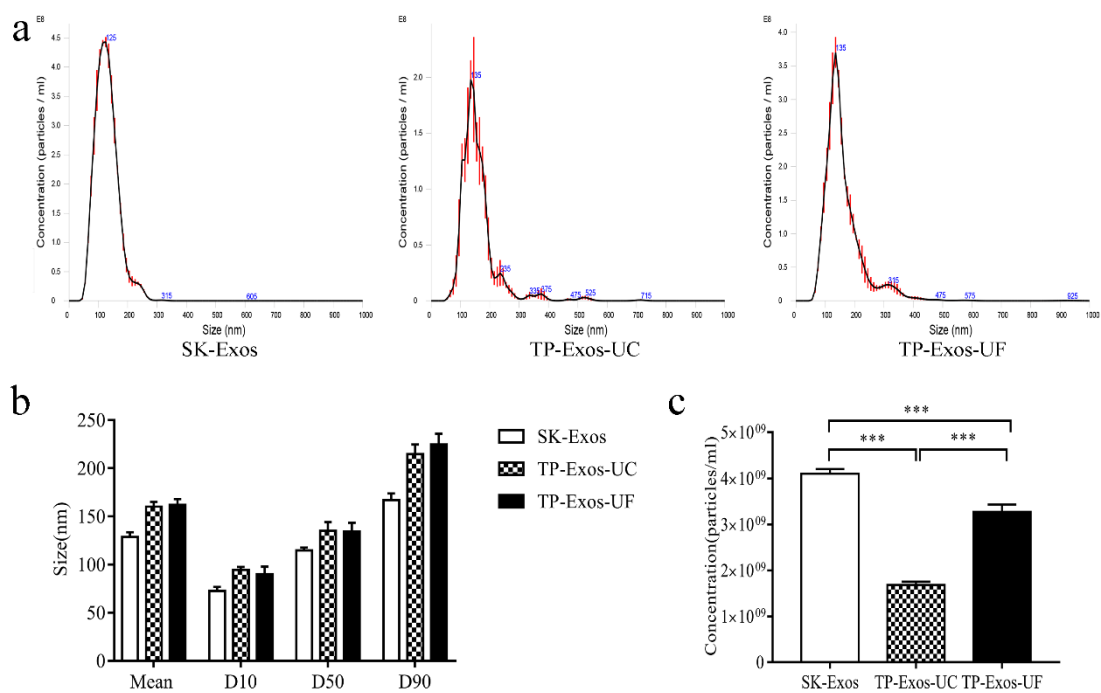

Supplemental Figure 1

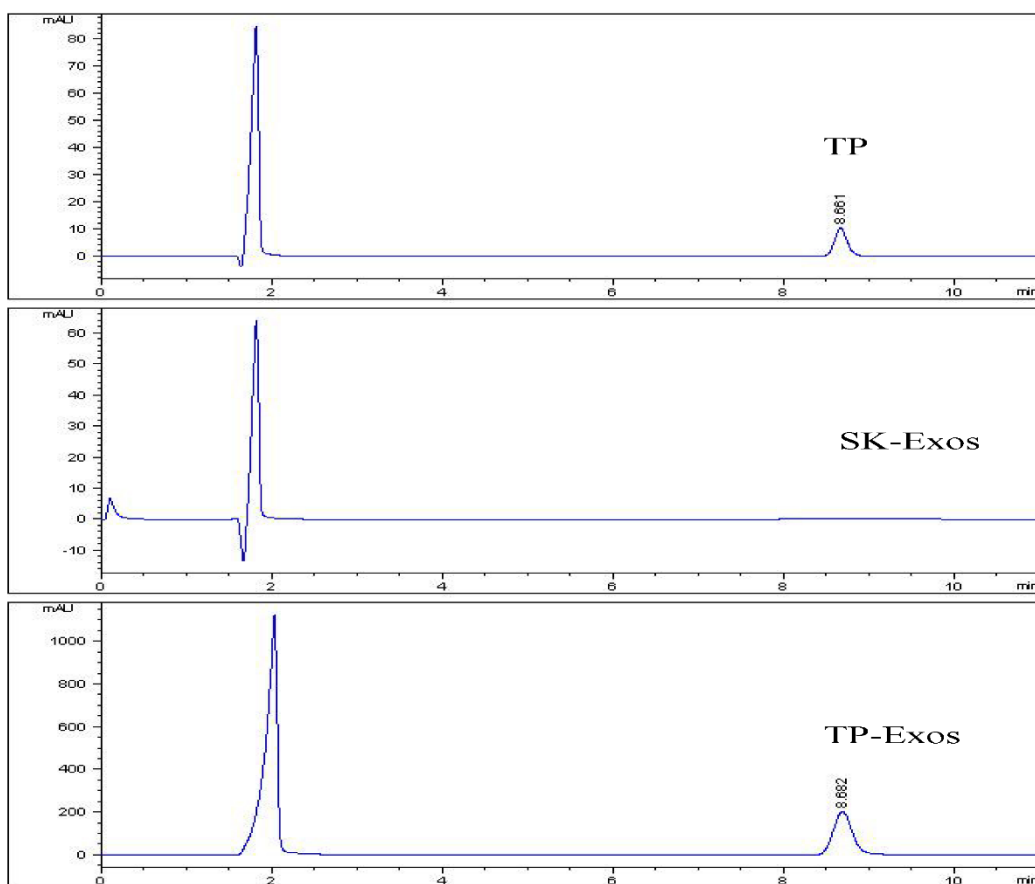

Supplemental Figure 2.1

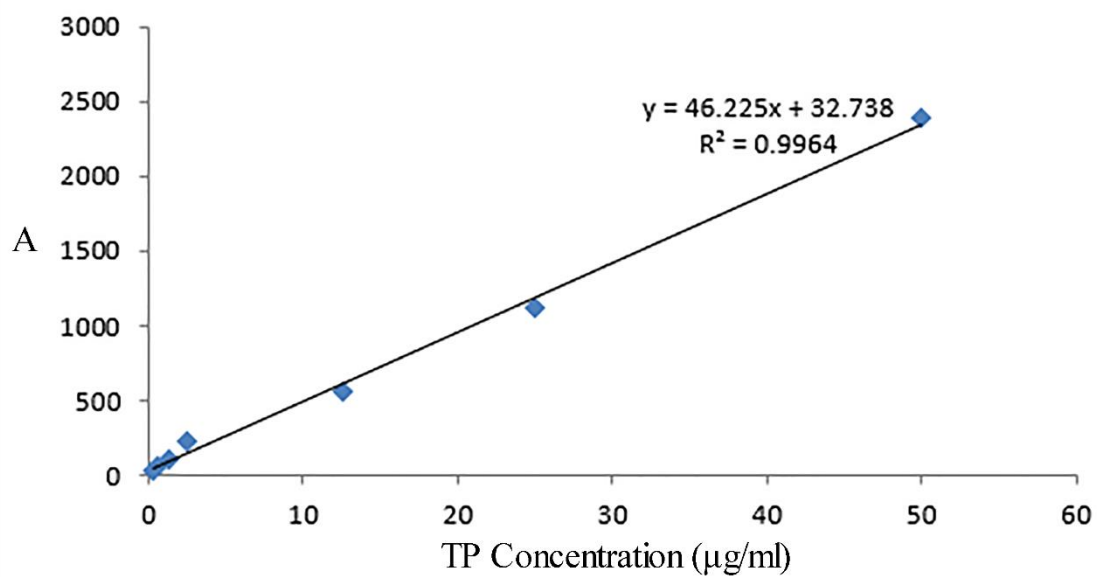

Supplemental Figure 2.2

Supplemental Table 1

| Sample                                 | 1              | 2        | 3        |
|----------------------------------------|----------------|----------|----------|
| A                                      | 118.9685       | 123.2367 | 120.7966 |
| Found ( $\mu\text{g/ml}$ )             | 1.865          | 1.958    | 1.905    |
| Total amount of drug ( $\mu\text{g}$ ) | 5              | 5        | 5        |
| Drug entrapped ( $\mu\text{g}$ )       | 3.74           | 3.92     | 3.81     |
| Encapsulation efficiency (%)           | 74.8           | 78.4     | 76.2     |
| Mean Encapsulation efficiency (%)      | 76.5 $\pm$ 1.8 |          |          |
